# Supplementary material for: Retrotransposon‐based genetic diversity of Deschampsia antarctica Desv. from King George Island (Maritime Antarctic)
Source: PubMed Central journal article supplement (PMC7790655; doi:10.1002/ece3.7095), 2020-12-16

Supplementary File to:

Piotr Androsiuk, Katarzyna J. Chwedorzewska, Justyna Dulcka, Sylwia Milarska and Irena Gielwanowska

**Retrotransposon-based genetic diversity of *Deschampsia antarctica*** Desv. from King George Island (Maritime Antarctic)

**Table S1.** Photographic documentation of nine *D. antarctica* populations from King George Island (photographs by Irena Gielwanowska). Numbers of populations according to

Table 1.

Population #1

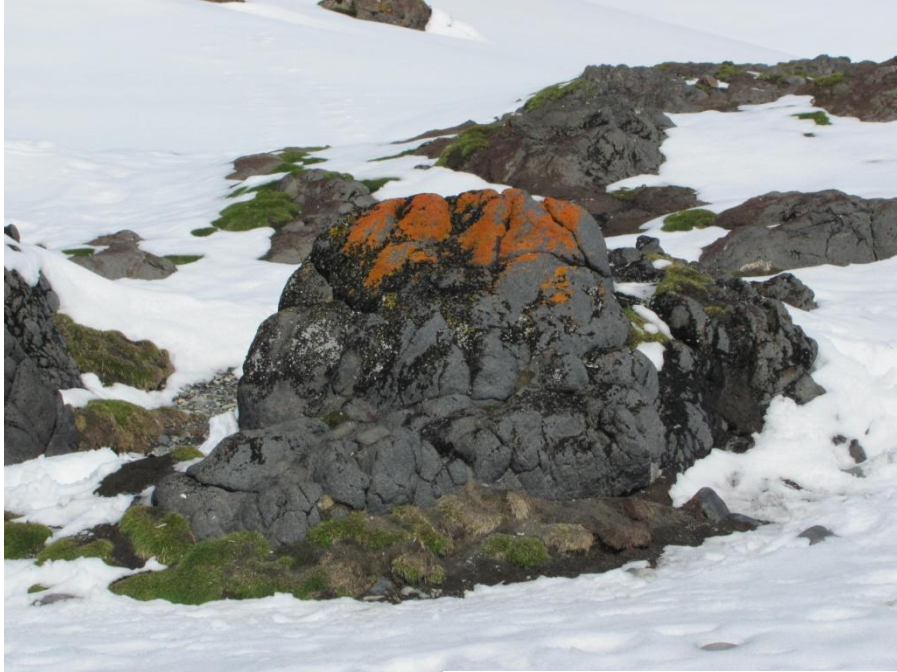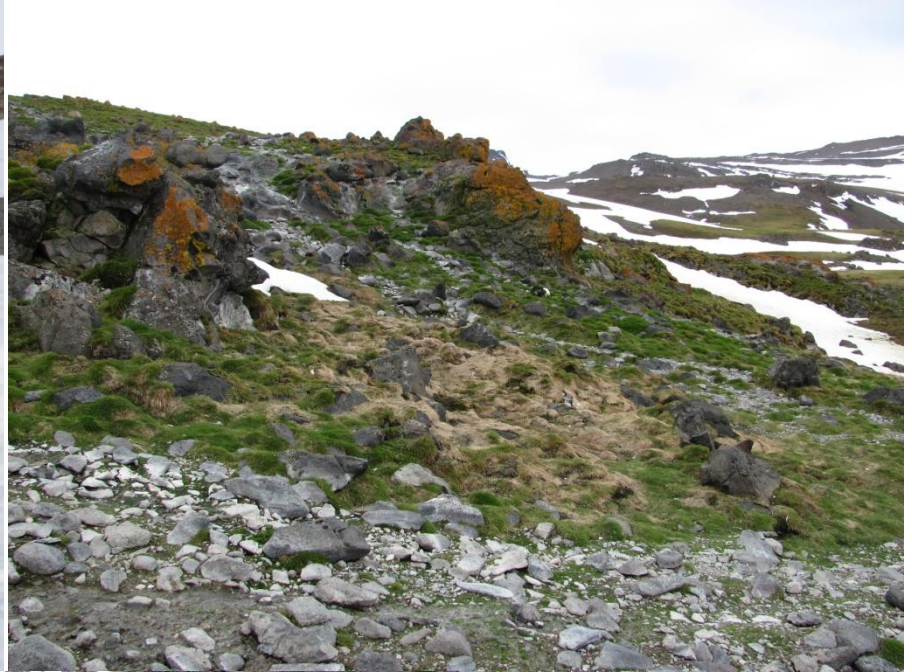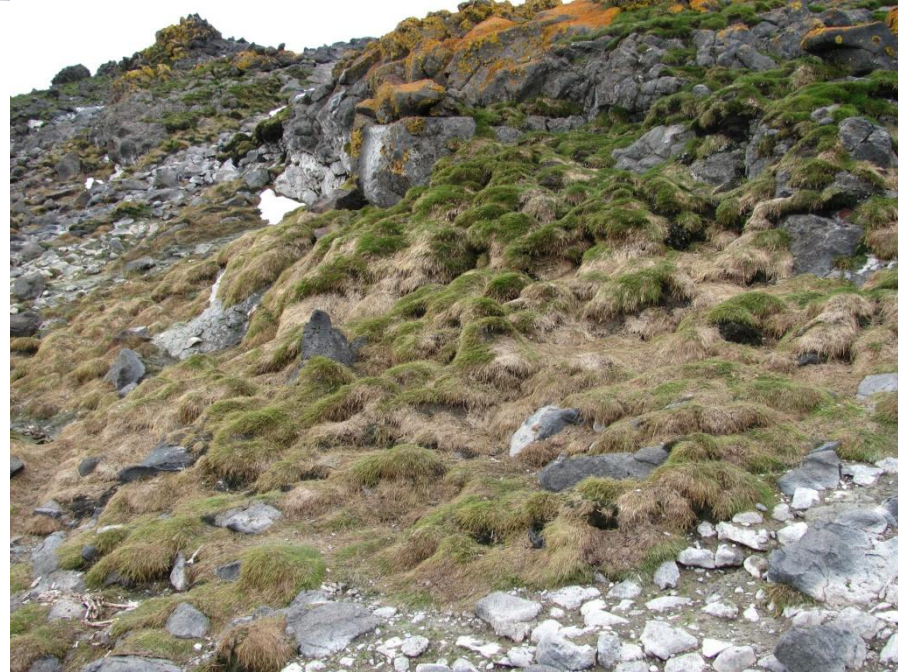



Population #2

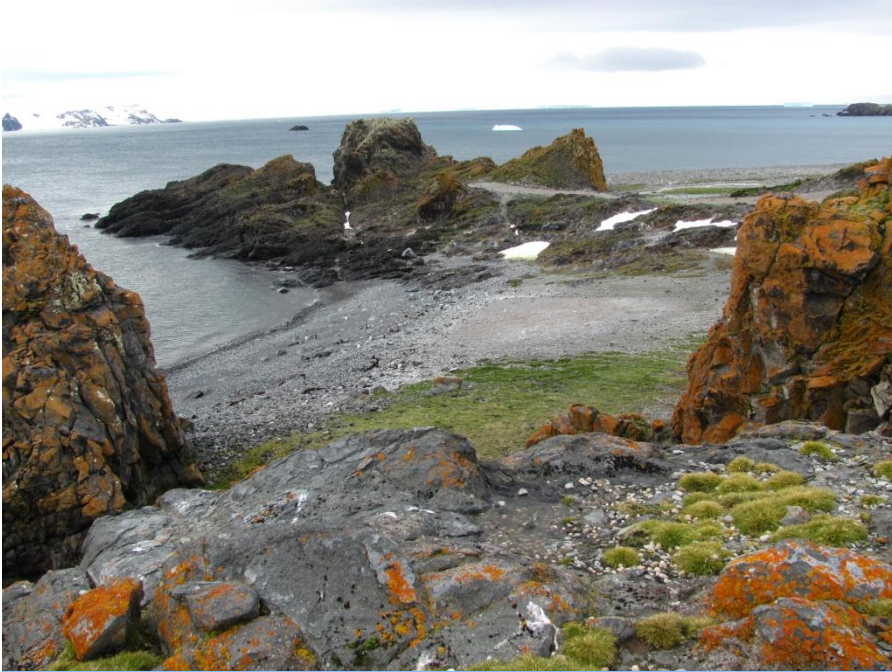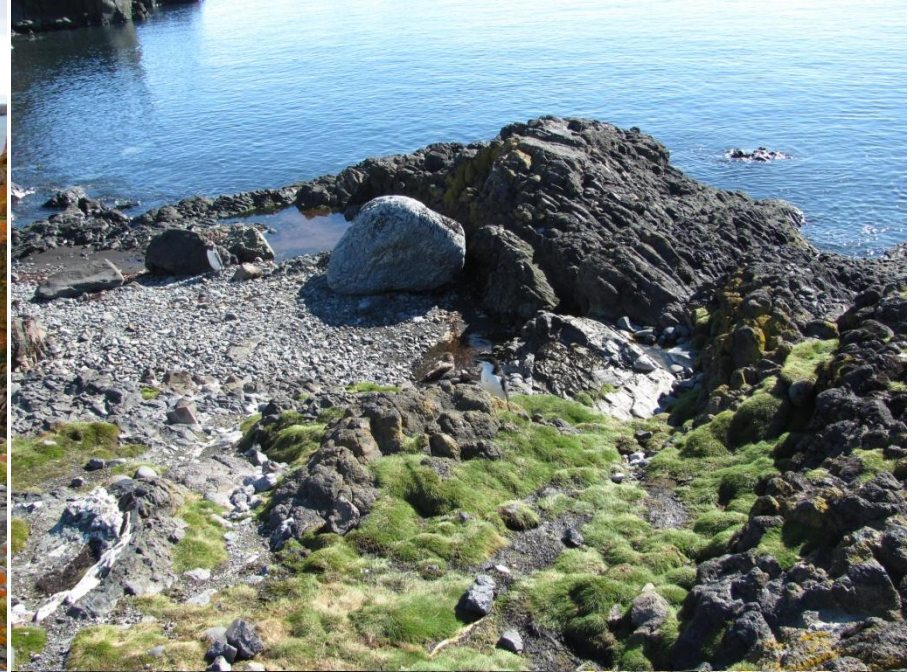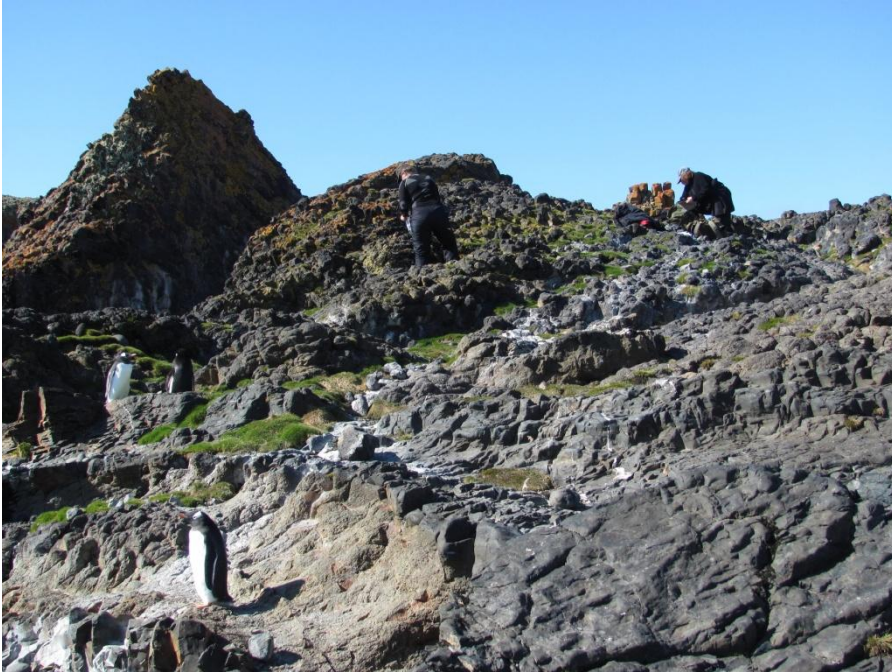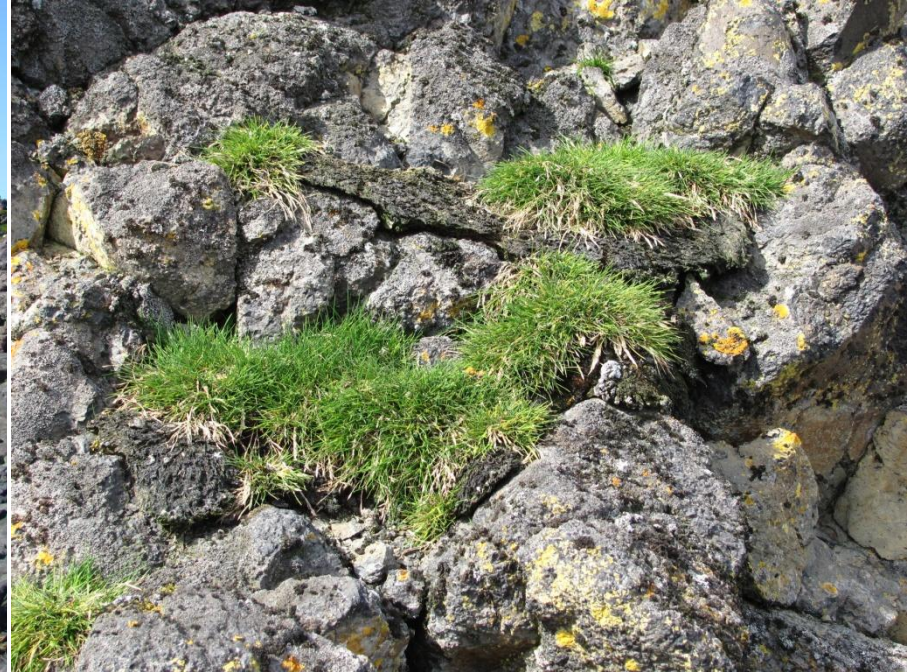



Population #3

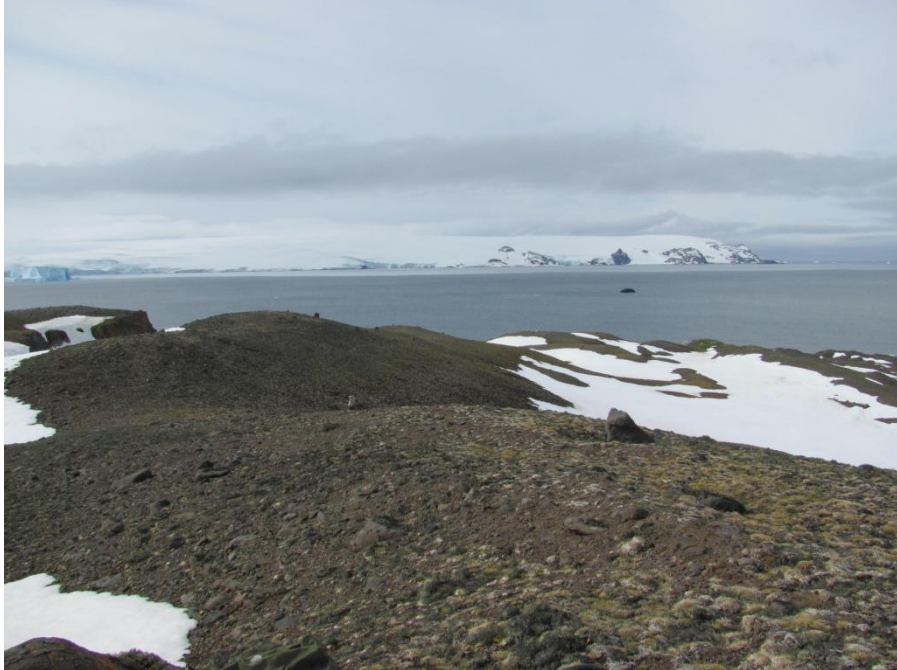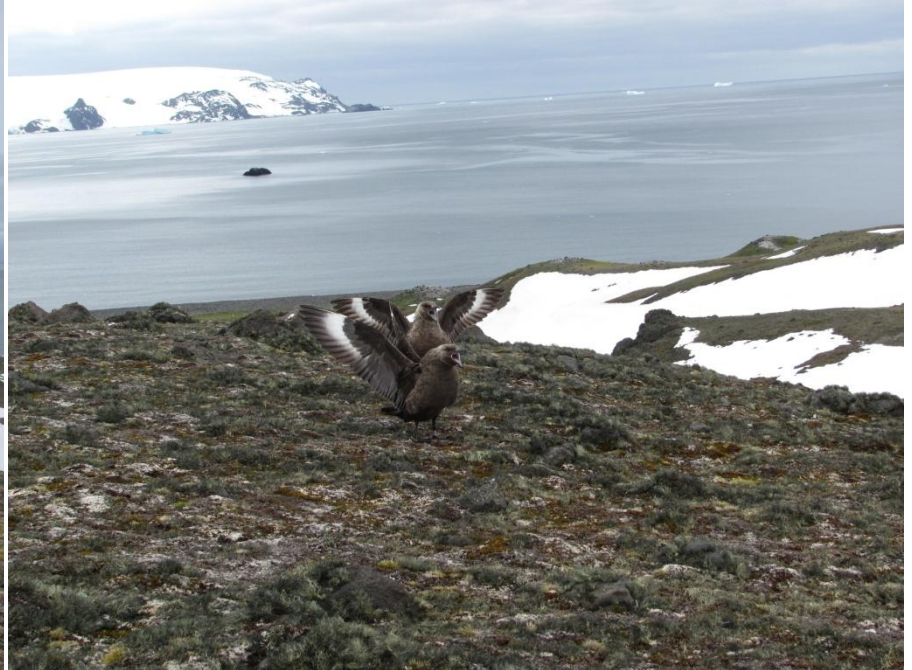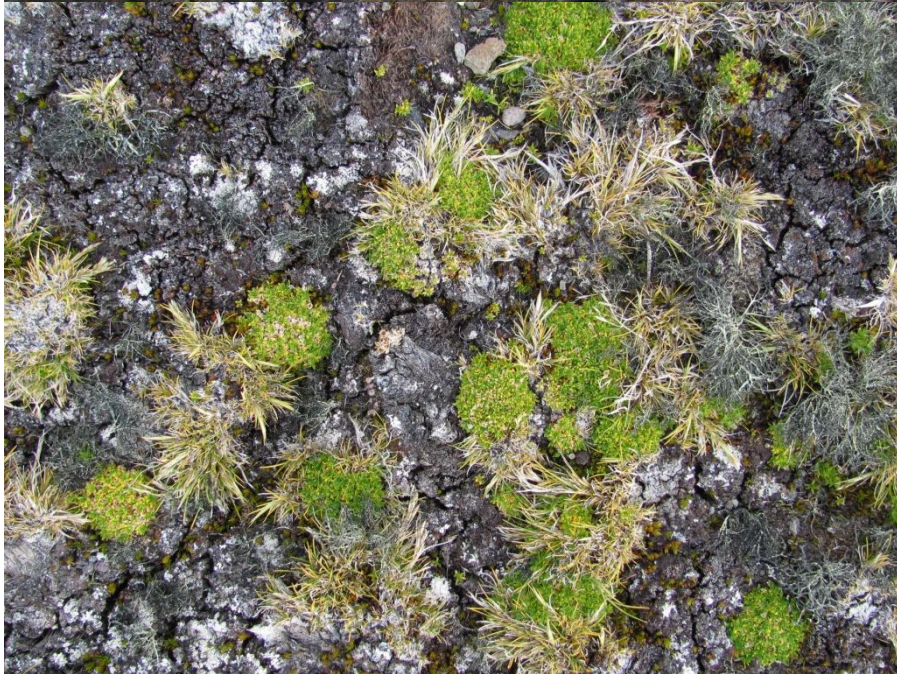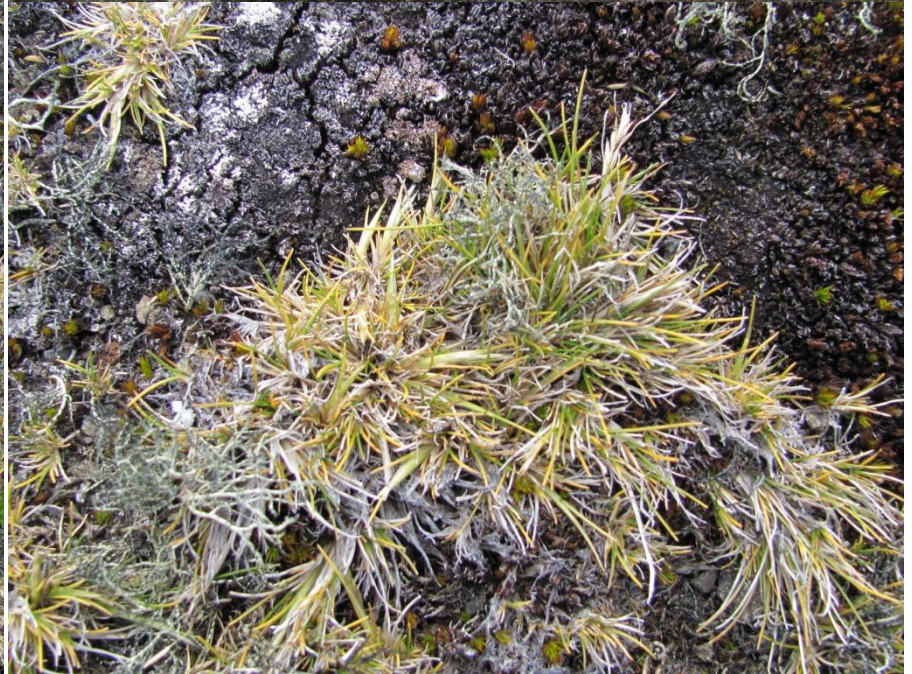



Population #4

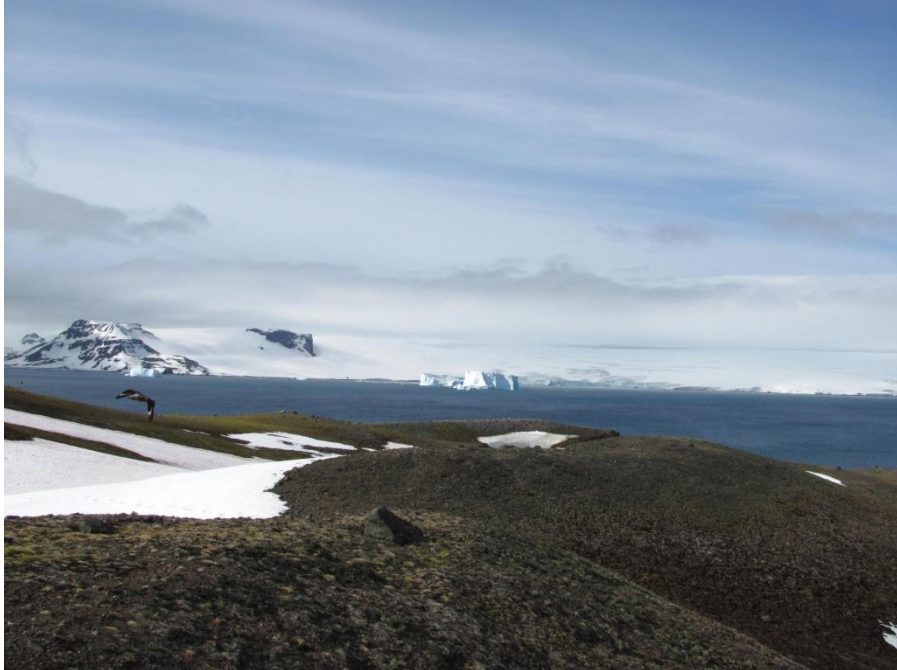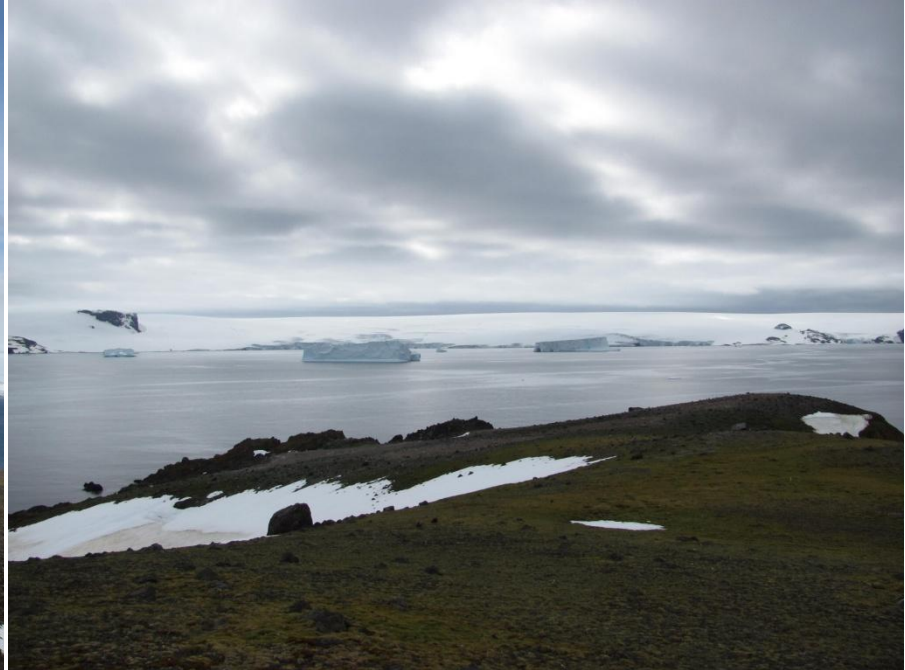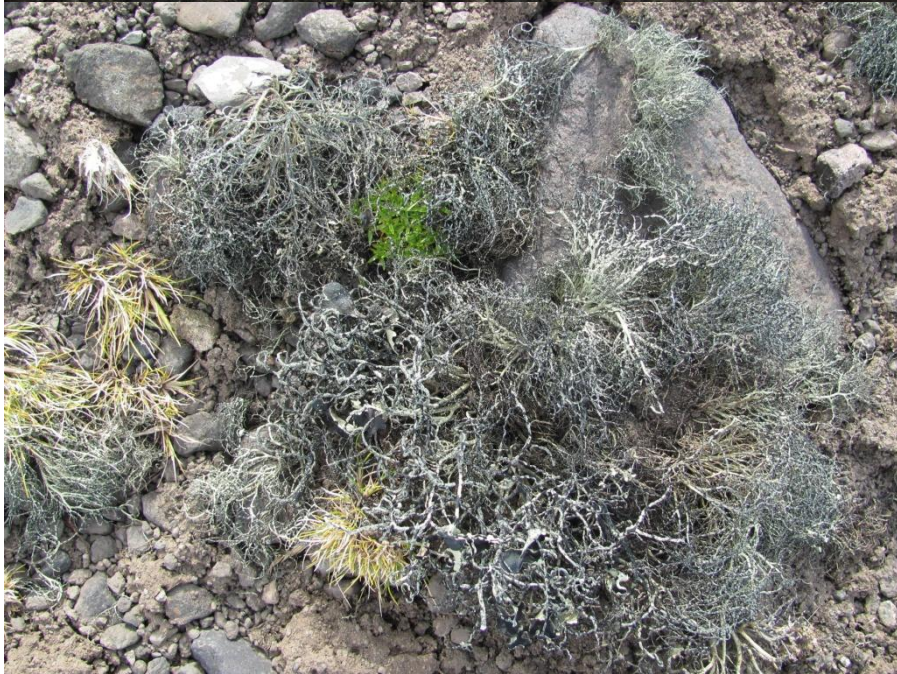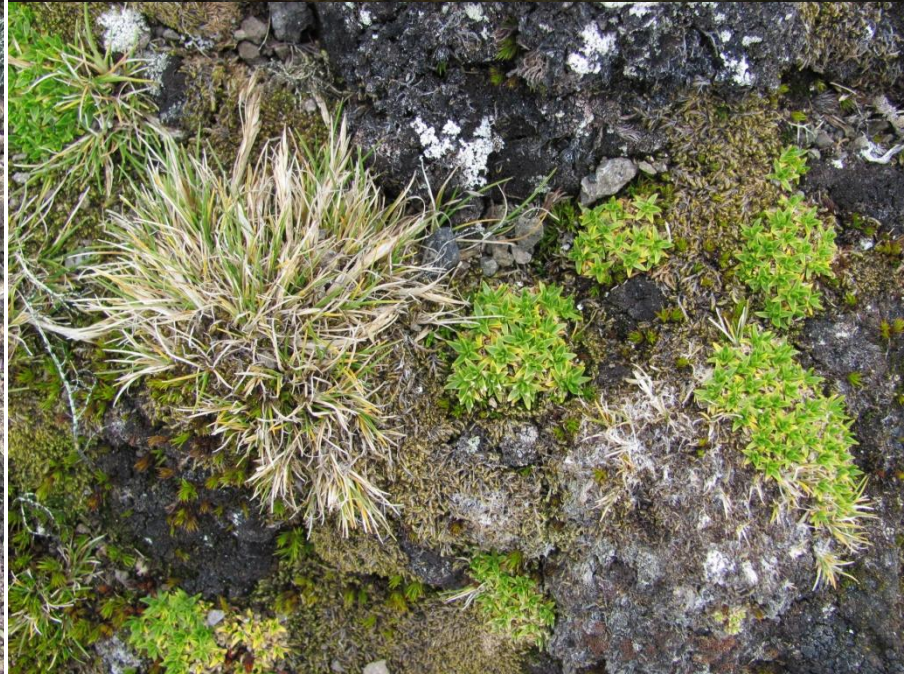



Population #5

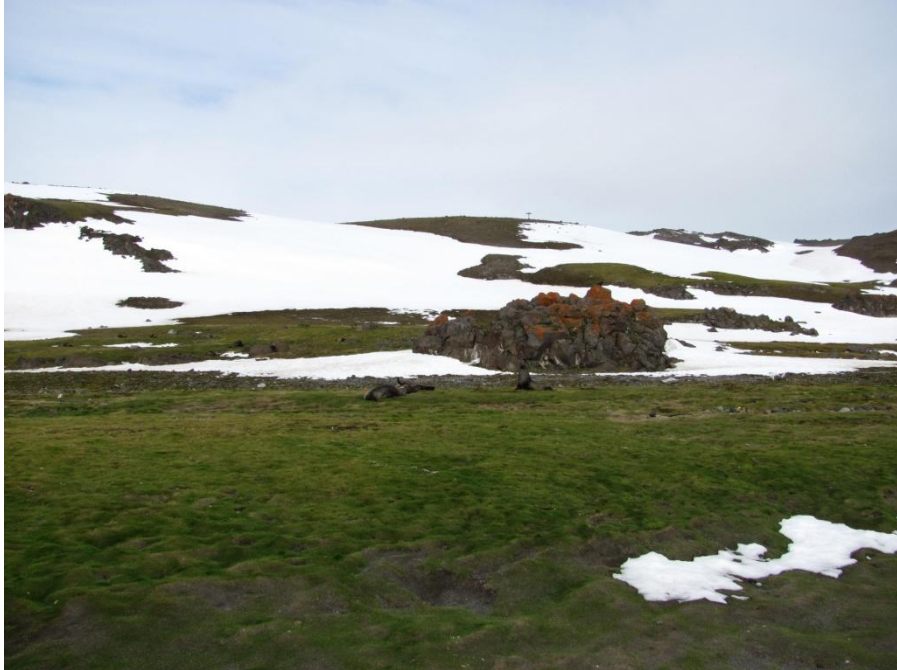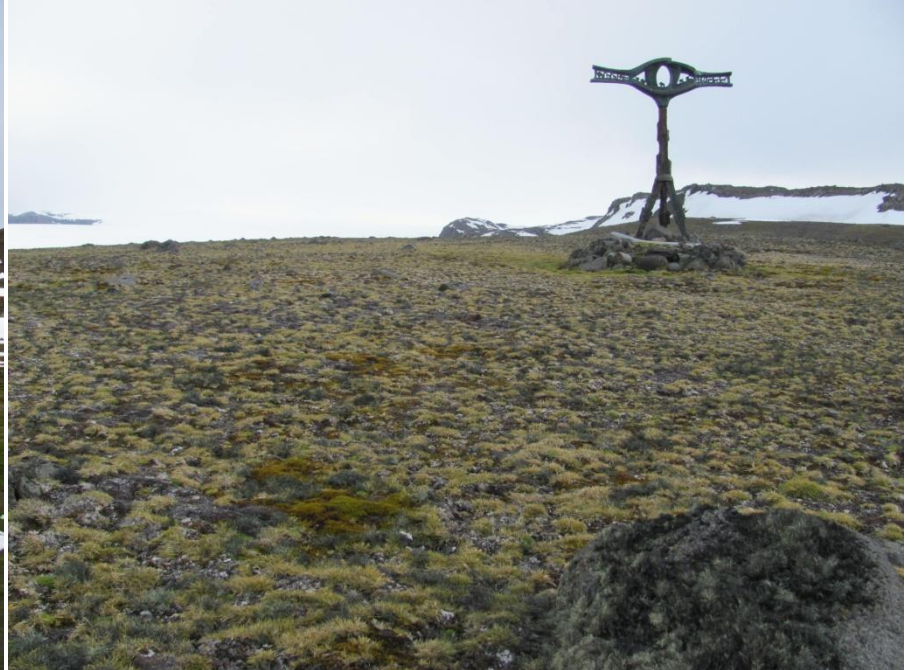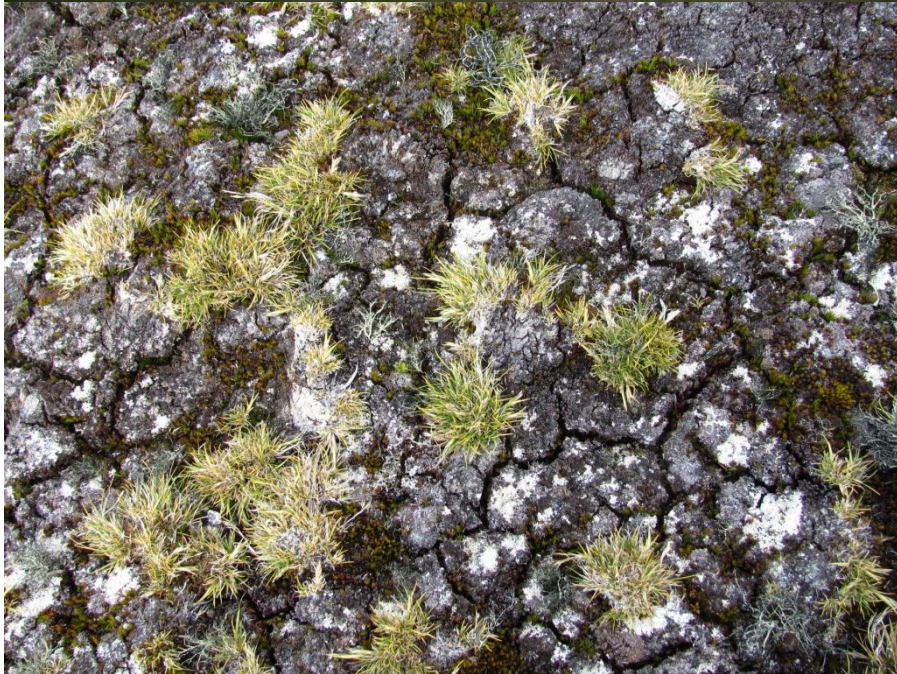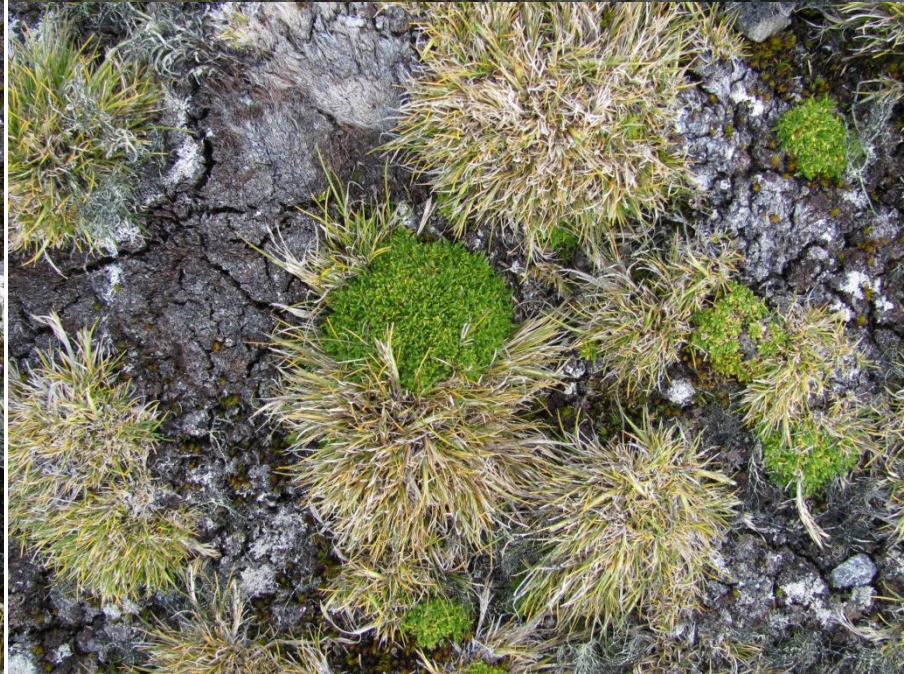



Population #6

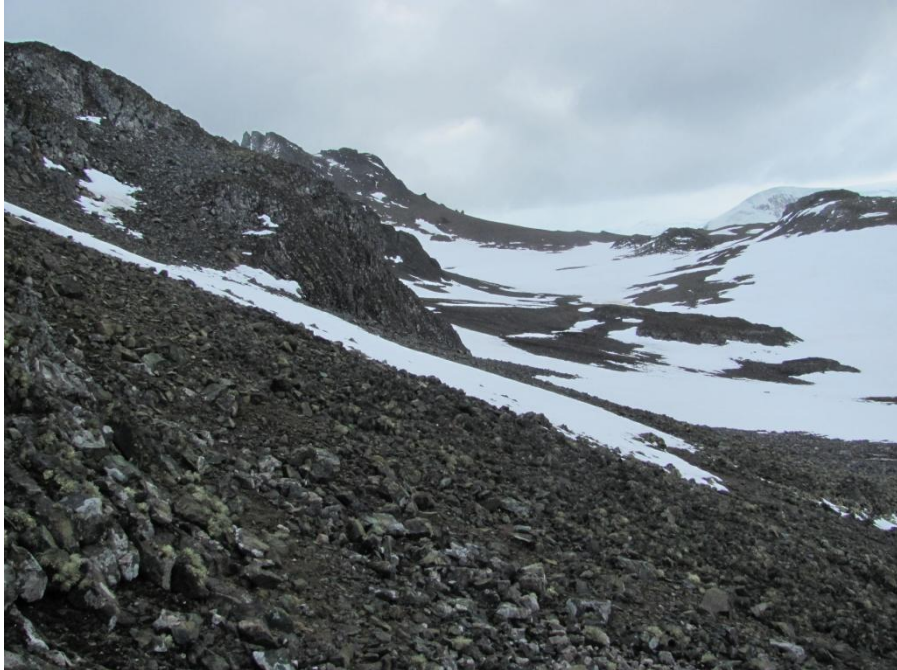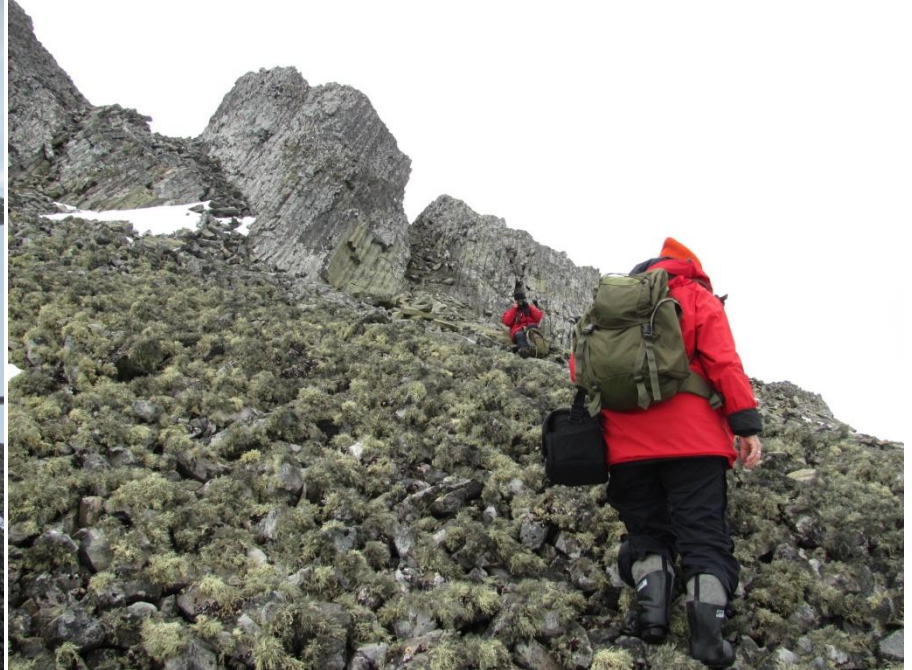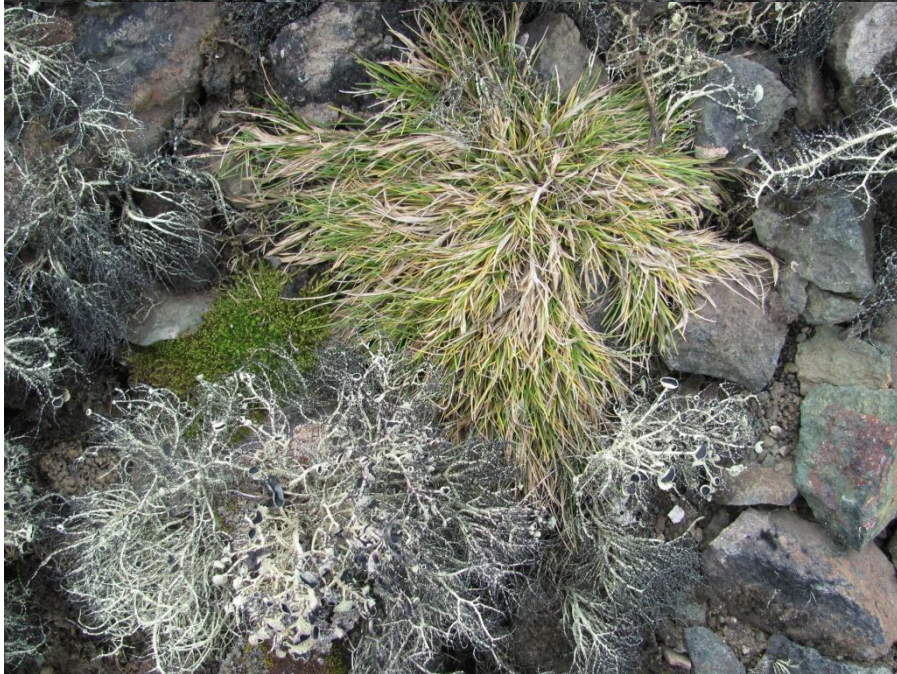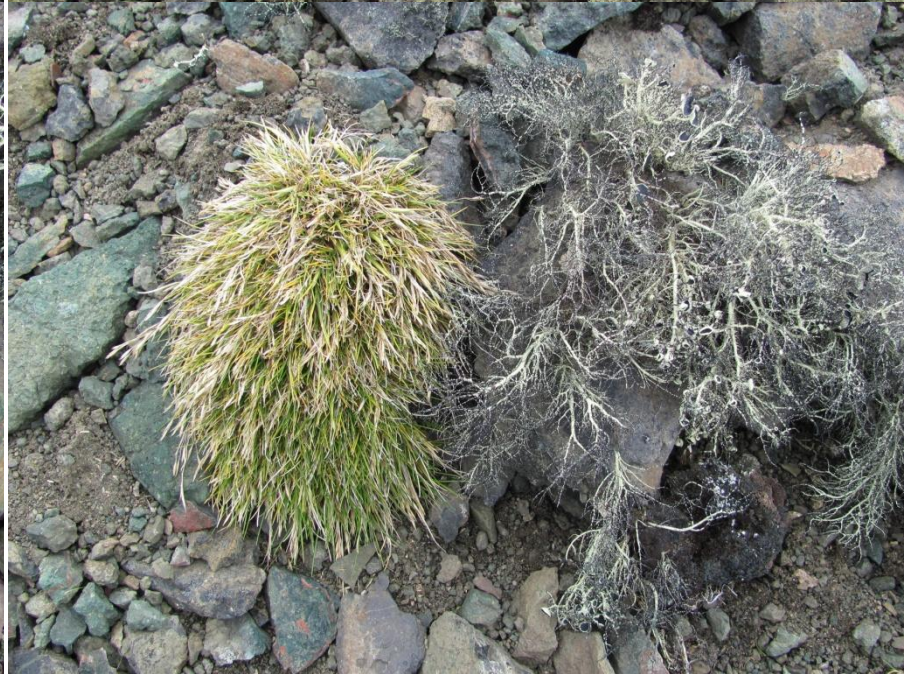



Population #7

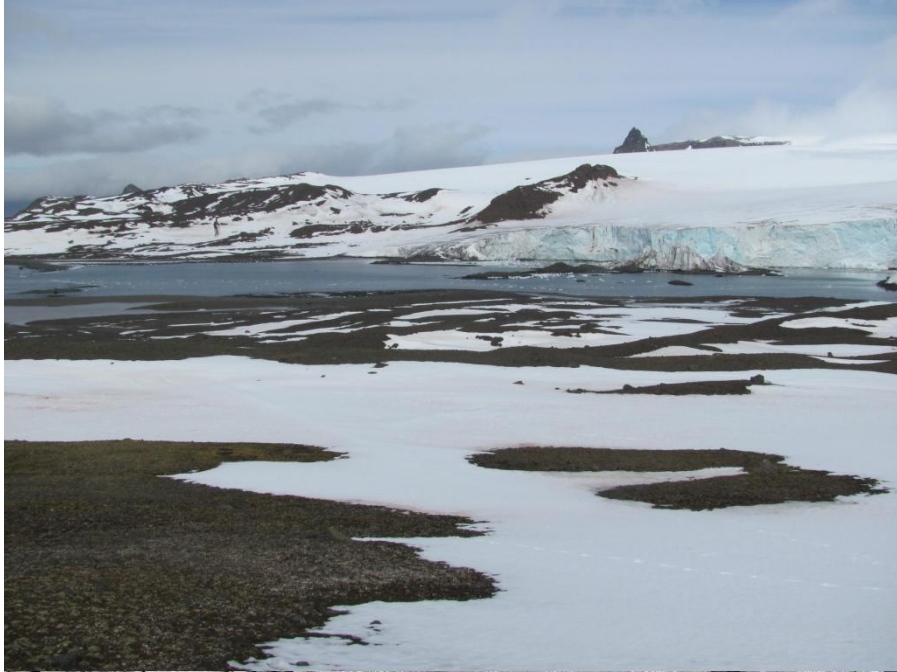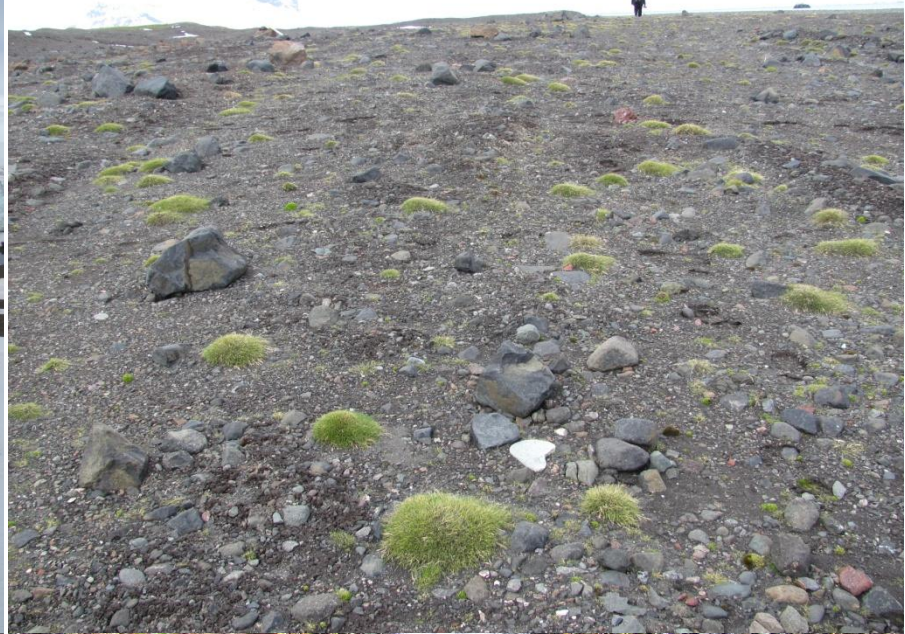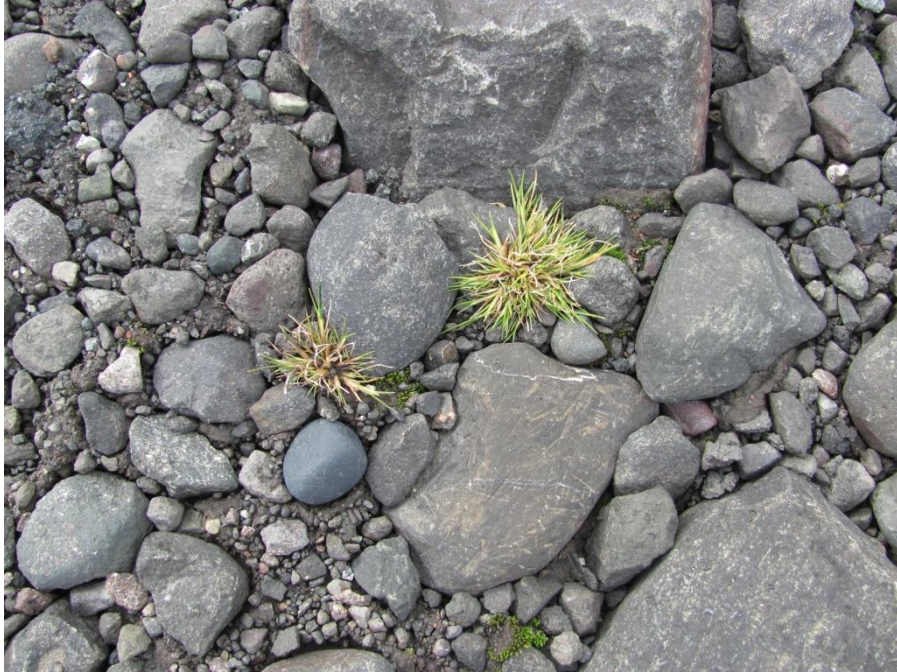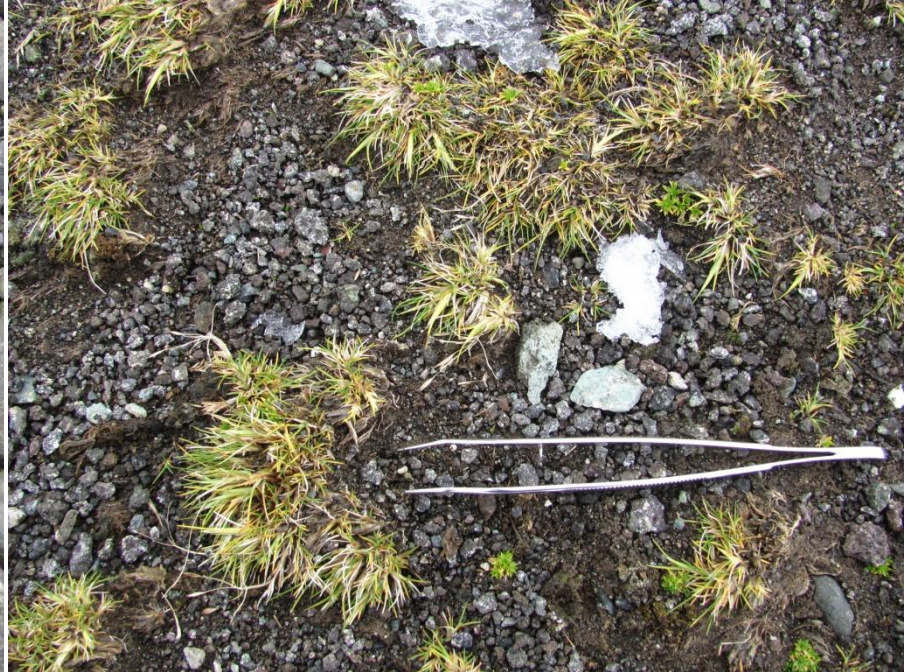



Population #8

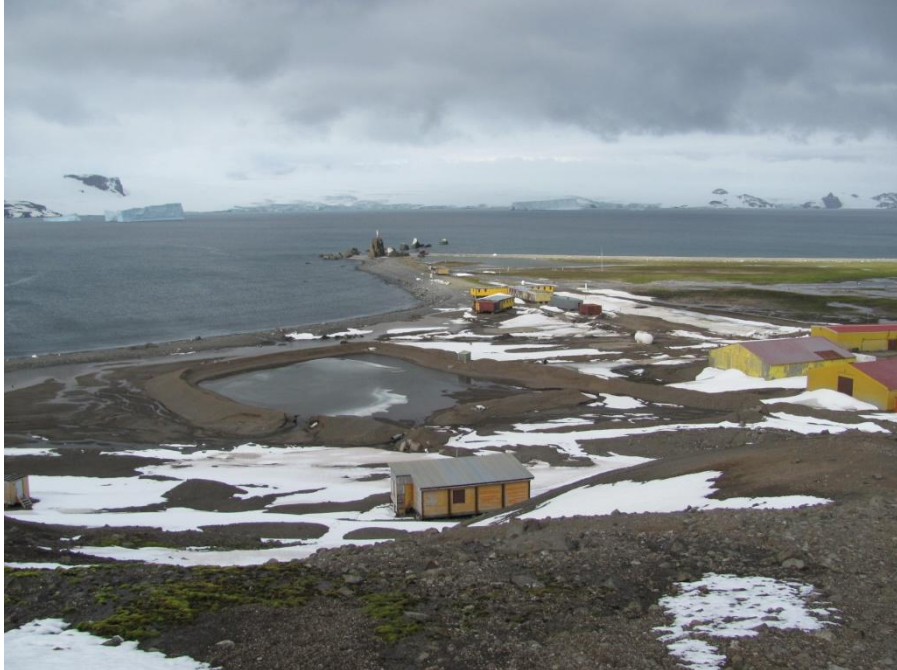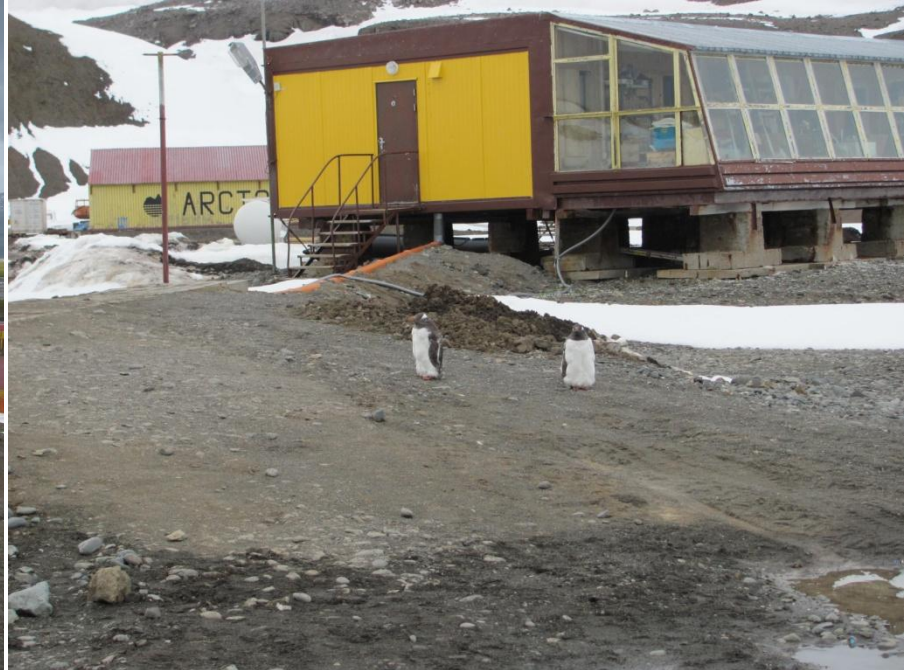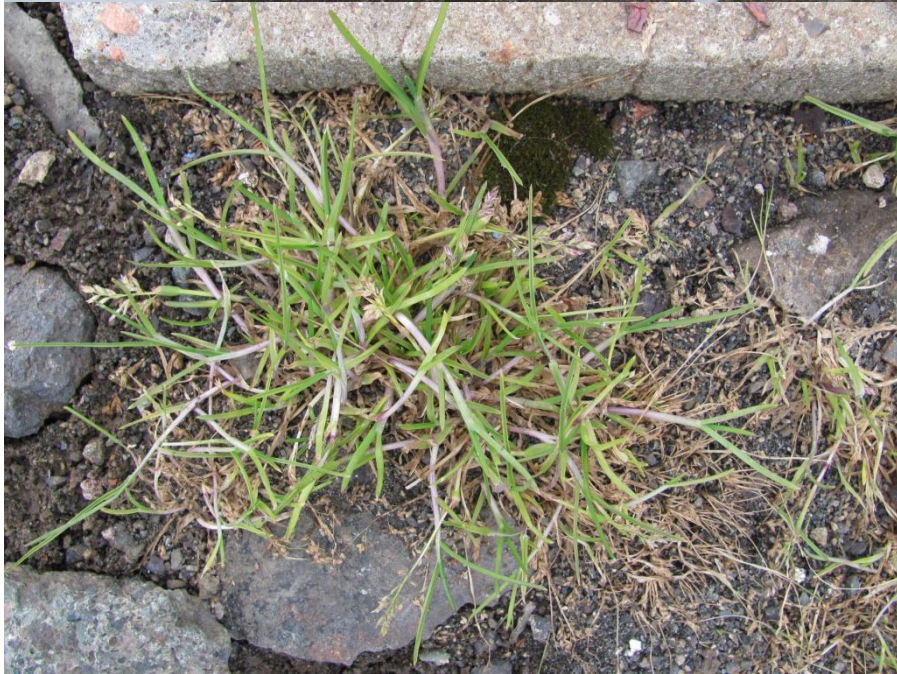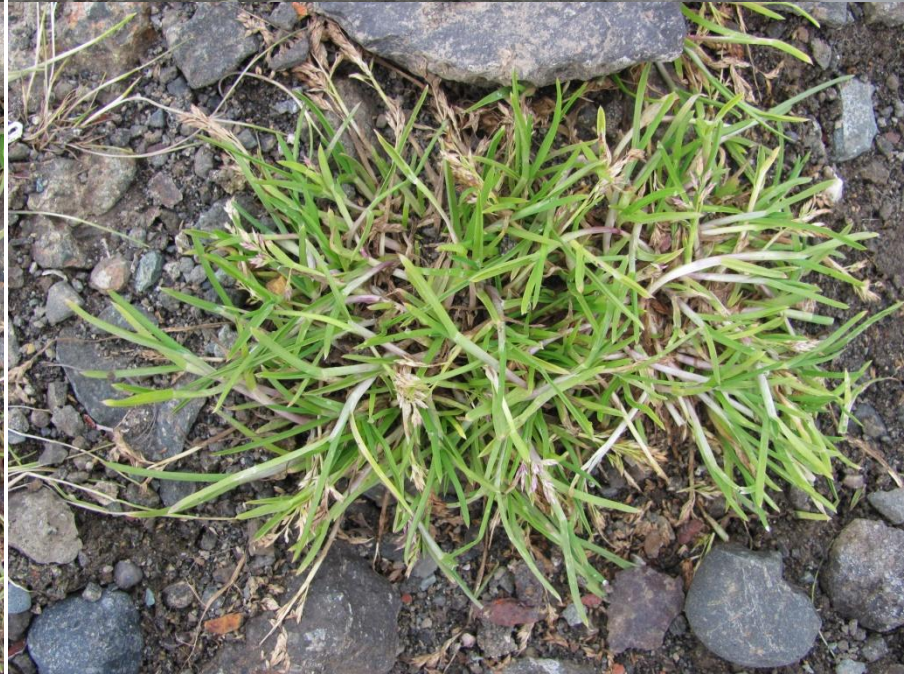



Population #9

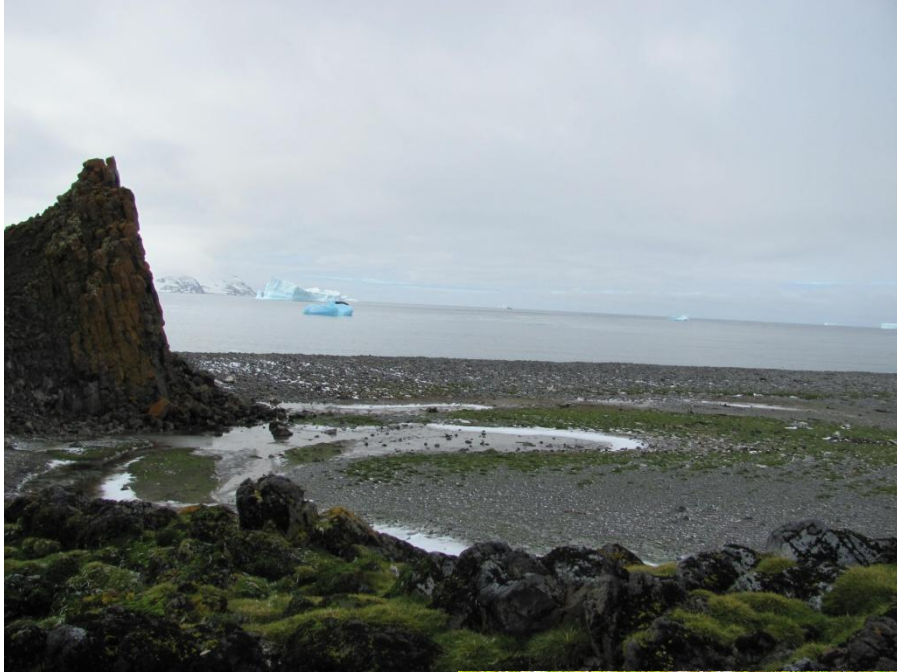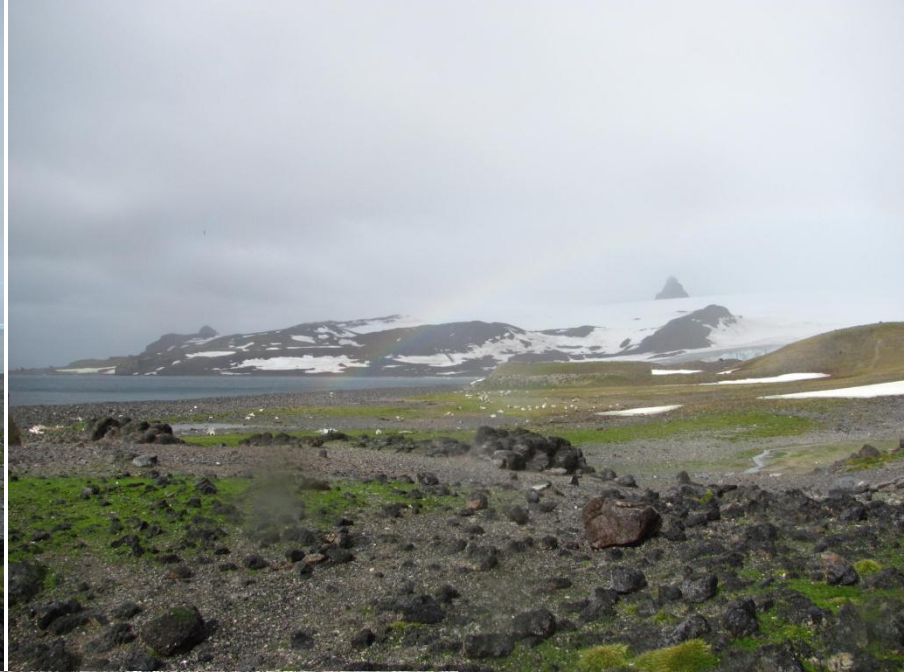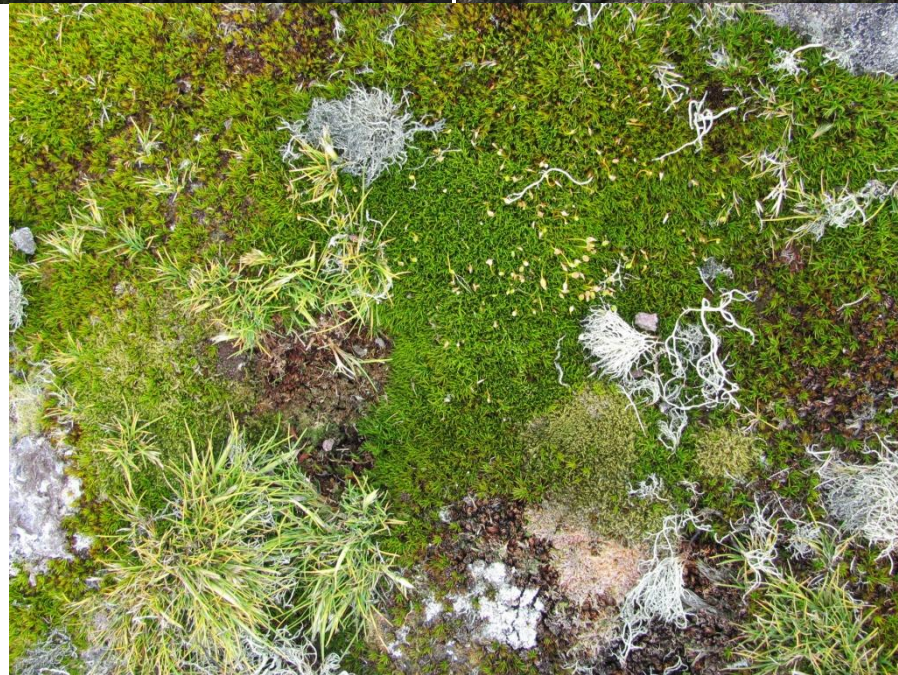

Supplement: ECE3-11-648-s001.pdf [file ECE3-11-648-s001.pdf]
